# Supplementary material
Source: PubMed Central journal article supplement (PMC5728446)
Supplement: NIHMS917693-supplement-1.pdf [file NIHMS917693-supplement-1.pdf]

## Supplemental Information

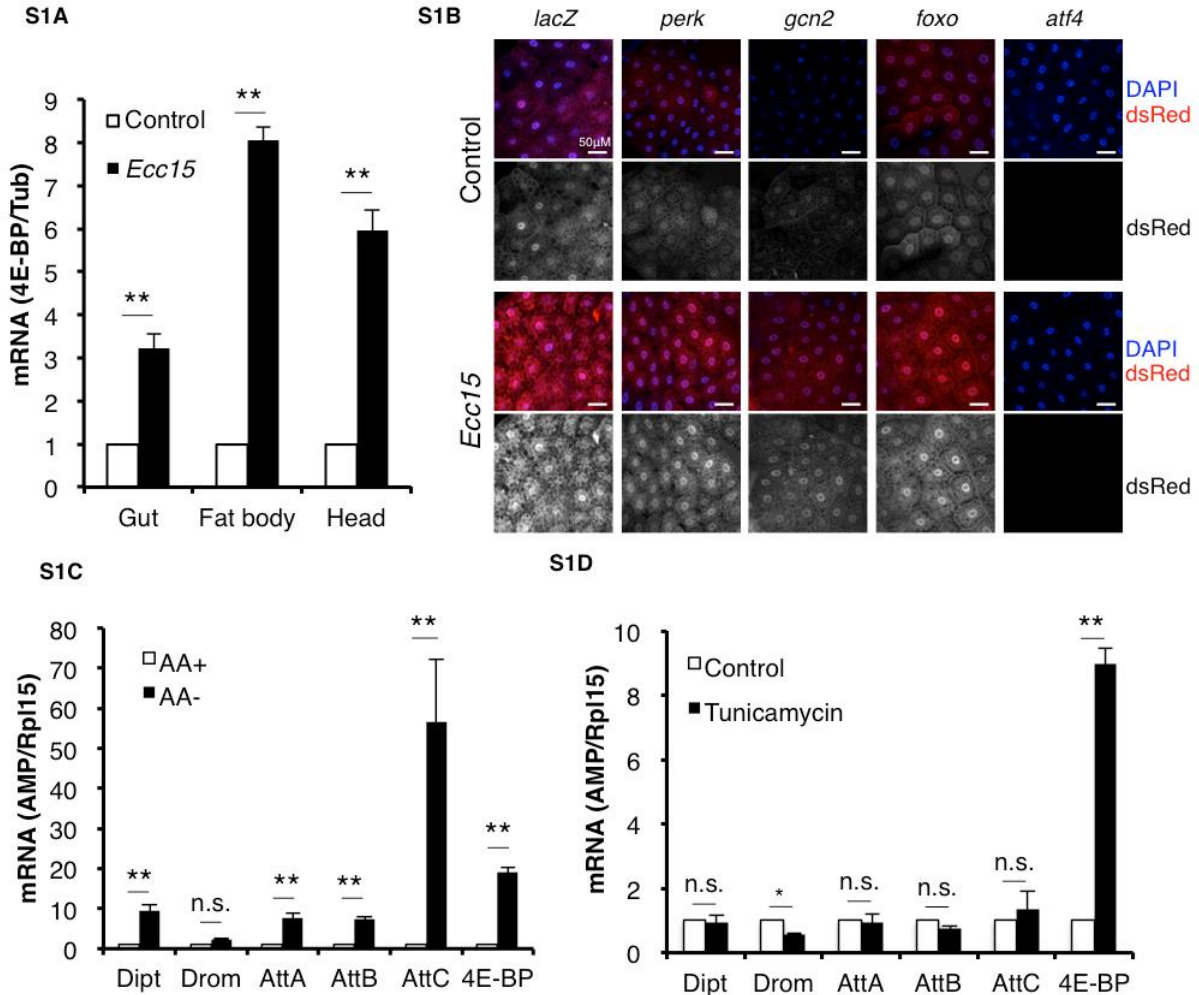

**Fig. S1. GCN2 regulates *4e-bp* in the fat body during infection (Related to Figure 1)**

**S1A.** qPCR analysis of *4E-BP* in tissues indicated on the X-axis from control or infected *yw* larvae.

**S1B.** 4E-BP<sup>intron</sup>-dsRed expression in the uninfected control larva (top) and in larva infected with *Ecc15* (bottom) in various RNAi backgrounds driven by *Dcg-Gal4*.

**S1C.** qPCR analysis of AMP induction in response to amino acid deprivation in S2 cells.

**S1D.** qPCR analysis of AMP induction in response to tunicamycin treatment in S2 cells.

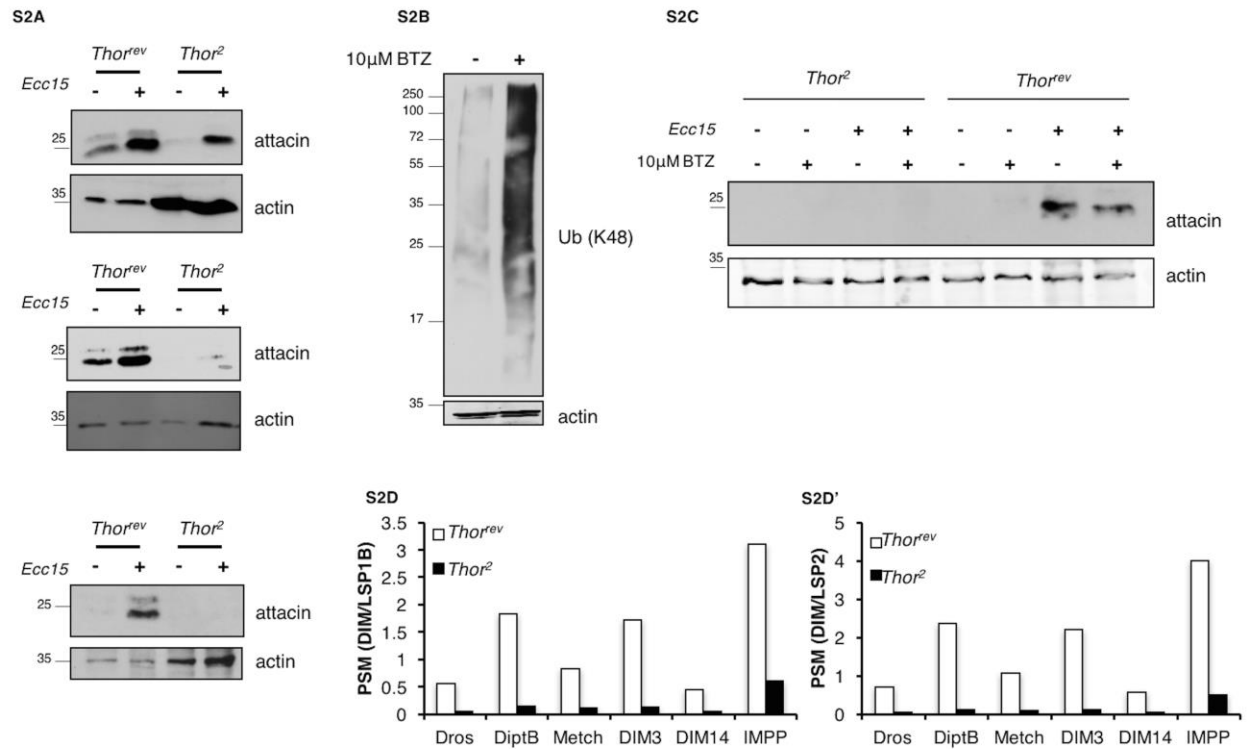

**Fig. S2. 4E-BP regulates translation of AMPs (Related to Figure 2)**

**S2A.** Individual blots used for quantification in 2B'.

**S2B.** Western blot analysis of whole larval lysates from larvae fed with 10μM bortezomib (BTZ) with anti-ubiquitin (Ub K48) and anti-actin.

**S2C.** Western blot analysis of hemolymph collected from homozygotic *Thor<sup>2</sup>* and *Thor<sup>rev</sup>* larvae infected with *Ecc15* and simultaneously fed with BTZ.

**S2D, D'.** Mass spectrometry analysis of hemolymph from *Thor<sup>rev</sup>* (white) and *Thor<sup>2</sup>* (black) similar to Fig. 2C. Graph on top shows data normalized to LSP1B and on bottom to LSP2. (LSP= larval serum protein).

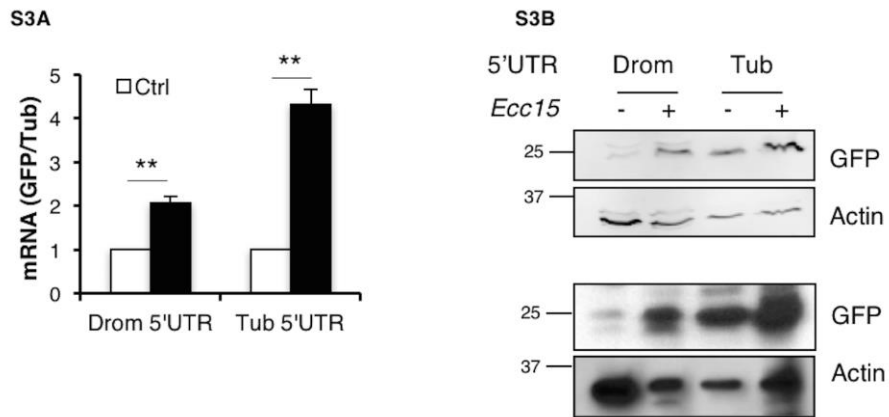

**Fig. S3. 4E-BP enhances cap-independent translation mediated by Drosomyacin 5'UTR during infection (Related to Figure 4)**

**S3A.** qPCR analysis of transgenic larvae expressing monocistronic reporters (schematic on top) driven by the Drosomyacin promoter (DromP) with indicated 5'UTRs (Drom= Drosomyacin, Tub= Tubulin) infected with *Ecc15*.

**S3B.** Individual western blots used for quantitation in Figure 4D'.

## Detailed methods

### *Antibodies*

Mouse anti-GFP 1:500 for IF and 1:2000 for WB (A6455, Life Technologies), rabbit anti-dsRed 1:500 for IF and 1:2000 for WB (R10367, Thermo Fisher), mouse anti-actin 1:5000 WB (MAB1501, Millipore), mouse anti-attacin (Dr. Donggi Park) 1:500 WB.

### *Molecular cloning*

Luciferase bicistronic and monocistronic reporter: The 5' UTR sequences for *Drosomyacin*, *Attacin A* and *4E-BP*, were subcloned into previously described luciferase bicistronic and monocistronic reporter constructs (Kang et al., 2017; Marr et al., 2007).

Fluorescent bicistronic reporter: The reporter backbone was generated in a pUAST vector by sequentially cloning in a GFP (XbaI) and dsRed (EcoRI), with the NotI and SacII sites in between them available for insertion of various 5'UTRs. 5'UTRs of *Drosomyacin* and *Attacin A* were assembled by extension PCR and inserted in the NotI/SacII sites in either the forward or reverse orientation. Expression was driven in S2 cells by co-transfecting *Act-Gal4*. All 5'UTR sequences used are indicated in [Table S2](#).

Drosomyacin-GFP monocistronic reporter: The Drosomyacin promoter (Drom<sup>P</sup>) was cloned into the pattB vector at the BglII/KpnI sites. The Drosomyacin 5'UTR-Drosomyacin GFP and Tub5'UTR-Drosomyacin GFP sequences were generated by gene synthesis (General Biosystems) and cloned sequentially into the pattB-Drom<sup>P</sup> vector using the KpnI/XbaI sites. The reporters were inserted at the attP2 site on chromosome III (BestGene). [Table S3](#) lists sequence and primer information.

### *Liquid chromatography and Mass spectrometry*

To enrich for small molecular weight AMPs, the hemolymph was passed through a 10kDa filter (Millipore). The fractions were then reduced with dithiothreitol (2  $\mu$ L of 0.2 M, pH 8) for 1 hr at 57°C and subsequently alkylated with iodoacetamide (2  $\mu$ L of 0.5 M, pH 8) for 45 min in the dark at room temperature. Immediately following alkylation, peptides were desalted using a solid phase extraction (SPE) cartridge containing C18 resin. The resulting eluate was then concentrated to dryness and resuspended in 0.5% acetic acid for mass spectrometric analysis. Each sample was separated by reverse phase chromatography using an EASY-nanoLC 1000 system (Thermo Scientific) configured for preconcentration using an Acclaim PepMap trap column in line with an EASY-Spray 50 cm x 75  $\mu$ m ID PepMap C18 analytical column (2  $\mu$ m beads). Solvent A was 2% acetonitrile containing 0.5% acetic acid and solvent B was 80% acetonitrile with 0.5% acetic acid. Separation was carried out using a linear gradient from 5-35% solvent B over the first 60 min and then increased to 45% B over 10 min. The gradient was then ramped to 100% B over 10 min and held constant for an additional 10 min. The LC system was coupled via an EASY nano-electrospray ionization source (Thermo Scientific) maintained at 2.0 kV to a Q-Exactive Orbitrap mass spectrometer (Thermo Scientific). For all experiments, high-resolution MS1 spectra were acquired with a resolving power of 70K (at m/z 200), automatic gain control (AGC) target of 1e6, maximum ion time of 120 ms, and scan range of 400 to 1500 m/z.

Following each MS1 scan, data-dependent acquisition of high resolution HCD MS2 spectra were acquired for the top 20 most abundant precursor ions in the preceding full scan. All MS2 spectra were collected using a single microscan at 17,500 (at m/z 200), AGC target of 5e4, maximum injection time of 120 ms, 2 m/z isolation window, and Normalized Collision Energy (NCE) of 27. All LC-MS/MS data was searched using a standalone version of the Byonic algorithm (Protein Metrics Inc.) against a *Drosophila* UniProt database modified to include known antimicrobial and immune-induced peptide/protein sequences. All data was analyzed using a no enzyme (non-specific) search with a precursor mass tolerance of  $\pm 10$  ppm and fragment ion mass tolerance of  $\pm 10$  ppm. Carbamidomethylation of Cys was added as a static modification and oxidation of methionine and deamidation of glutamine and asparagine were searched as a variable modification. The results were filtered to only include peptides identified with a Byonic score of 300 or better. Details for the peptides used in this analysis can be found in [Table S4](#).

#### *Luciferase assays buffers*

FF assay buffer: 75 mM HEPES pH 8.0, 5 mM MgSO<sub>4</sub>, 20 mM DTT, 100  $\mu$ M EDTA, 530  $\mu$ M ATP, 0.5 mM coenzyme A, and 0.5 mM D-luciferin

Ren assay buffer: 25 mM Na<sub>4</sub>PPi, 10 mM NaOAc, 15 mM EDTA, 0.5 M Na<sub>2</sub>SO<sub>4</sub>, 1.0 M NaCl, and 0.1 mM Coelenterazine.

#### *In vitro translation assays*

Translation assays were performed in 10  $\mu$ l reactions containing: 6  $\mu$ l of rabbit reticulocyte Lysate (Green Hectares, McFarland, WI), 0.1 mM spermidine, 60  $\mu$ M Amino Acids, 16.8 mM creatine phosphate, 800 ng of creatine kinase, 24 mM HEPES (pH 7.4), 0.4 mM Mg acetate, 30 mM K acetate, 1  $\mu$ g of calf liver tRNA, 2 units SUPERase-In RNase Inhibitor (ThermoFisher, #AM2696), and 100 ng of template RNA. Luciferase activity was measured using 100  $\mu$ l of FF assay buffer.

## Supplementary tables

| Genotype                                | Source                                                                                                                              |
|-----------------------------------------|-------------------------------------------------------------------------------------------------------------------------------------|
| $y^1 w^*$ ; $Thor^2$                    | BDSC #9559                                                                                                                          |
| $Thor^{rev}$                            | Generated by precise excision of a p-element insertion in the 4E-BP locus ( $y^1 w^*$ ; P{lacW}Thor <sup>k13517</sup> , BDSC #9558) |
| $cn^1 crc^1/SM5$                        | BDSC #266                                                                                                                           |
| $w^{1118}$ ; $foxo^{A94}/TM6B$ , $Tb^1$ | BDSC #42220                                                                                                                         |
| $4E-BP^{intron-dsRed}$                  | Kang, M.J. <i>et al</i> , <i>Journal of Cell Biology</i> , 2017                                                                     |
| $Dcg-Gal4$                              | Suh, J.M. <i>et al</i> , <i>Cell Metabolism</i> , 2007                                                                              |
| $UAS-ATF4^{RNAi}$                       | VDR #109014                                                                                                                         |
| $UAS-FOXO^{RNAi}$                       | VDR #106097                                                                                                                         |
| $UAS-PERK^{RNAi}$                       | VDR #110278                                                                                                                         |
| $UAS-GCN2^{RNAi}$                       | VDR #103976                                                                                                                         |

**Table S1. List of fly stocks used**

All stocks were ensured to be *Wolbachia* free, and mutants were isogenized with the control genetic backgrounds wherever applicable.

| 5'UTR      | Sequence                                                                                                                                                                                                                                                                                                                                                   | bps |
|------------|------------------------------------------------------------------------------------------------------------------------------------------------------------------------------------------------------------------------------------------------------------------------------------------------------------------------------------------------------------|-----|
| HCV        | CTCCCCTGTGAGGAACTACTGTCTTCACGCAGAAAGCGTCTAGCCATGGCGT<br>TAGTATGAGTGTCGTGCAGCCTCCAGGACCCCCCTCCCGGGAGAGCCATA<br>GTGGTCTGCGGAACCGGTGAGTACACCGGAATTGCCAGGACGACCGGTCCT<br>TTCTTGATTAACCCGCTCAATGCCTGGAGATTTGGGCGTGCCCCGCGAGA<br>CTGCTAGCCGAGTAGTGTGGGTGCGGAAAGGCCTTGTGGTACTGCCTGATA<br>GGGTGCTTGCAGAGTGCCCCGGGAGGTCTCGTAGACCGTGCATCATGAGCAC<br>AAATCCTGAACCTCAA | 326 |
| Drosomycin | CCACAAGTCGCTGATAATTCAAACAGAAATCATTTACCAAGCTCCGTGAGA<br>ACTTTTCCAAT                                                                                                                                                                                                                                                                                         | 63  |
| Attacin A  | AGTCAGCTCCAGCAATCCAGTTCAGCAAC                                                                                                                                                                                                                                                                                                                              | 29  |
| 4E-BP      | AGCAATCGCCTAGCGAACAGCCAACGGTGAACACATAGCAGCCACACAAGC<br>TCTATAGCTGATACAAGCAACGAAATACAAACAACGCAGTTTGTGTAAACA<br>ATCAAATTGTCGTAGCCATATCGAGTGTGCTTACACGTCCAGCGGAAAGTTT<br>TCGAAACCCATCCAATCAATCAGCTAAGATGTCCATG                                                                                                                                                | 191 |

**Table S2.** 5'UTR sequences tested in bicistronic and monocistronic assays

|                        |                                                                                                                                                                                                                                                                                                                                                                                                                                                                                                                                                                                                                                                                                                                                                                                                                                                                                                                                                                                                                                                                                                                                                                                                                                                                                                                   |
|------------------------|-------------------------------------------------------------------------------------------------------------------------------------------------------------------------------------------------------------------------------------------------------------------------------------------------------------------------------------------------------------------------------------------------------------------------------------------------------------------------------------------------------------------------------------------------------------------------------------------------------------------------------------------------------------------------------------------------------------------------------------------------------------------------------------------------------------------------------------------------------------------------------------------------------------------------------------------------------------------------------------------------------------------------------------------------------------------------------------------------------------------------------------------------------------------------------------------------------------------------------------------------------------------------------------------------------------------|
| Drom <sup>P</sup> -fwd | gaAGATCTaccagtgaagataaccgccc                                                                                                                                                                                                                                                                                                                                                                                                                                                                                                                                                                                                                                                                                                                                                                                                                                                                                                                                                                                                                                                                                                                                                                                                                                                                                      |
| Drom <sup>P</sup> -rev | ggGGTACCcttgggaacttcgaggagaa                                                                                                                                                                                                                                                                                                                                                                                                                                                                                                                                                                                                                                                                                                                                                                                                                                                                                                                                                                                                                                                                                                                                                                                                                                                                                      |
| Drom5'UTR-<br>Drom-GFP | CCACAAGTCGCTGATAATTCAAACAGAAATCATTACCAAGCTCCGTGAGAACCTTT<br>TCCAATATGATGCAGATCAAGTACTTGTTCGCCCTCTTCGCTGTCTGATGCTGGTGG<br>TCCTGGGAGCCAACGAGGCCGATGCCGACTGCCTGTCCGGAAGATAACAAGGGTCCC<br>TGTGCCGTCTGGGACAACGAGACCTGTCTGTCGTGTGTGCAAGGAGGAGGGACGCTC<br>CAGTGGCCACTGCAGCCCCAGTCTGAAGTGTGGTGCGAAGGATGCATGGTGAGCA<br>AGGGCGAGGAGCTGTTACACGGGGTGGTGCCCATCCTGGTTCGAGCTGGACGGCGAC<br>GTAACGGCCACAAGTTCAGCGTGTCCGGCGAGGGCGAGGGCGATGCCACCTACGG<br>CAAGCTGACCCTGAAGTTCATCTGCACCACCGGCAAGCTGCCCGTGGCCCTGGCCAC<br>CCTCGTGACCACCTGACCTACGGCGTGCAGTGCTTCAGCCGCTACCCCCGACCACAT<br>GAAGCAGCAGCACTTCTTCAAGTCCGCCATGCCCGAAGGCTACGTCCAGGAGCGCA<br>CCATCTTCTTCAAGGACGACGGCAACTACAAGACCCGCGCCGAGGTGAAGTTCGAG<br>GGCGACACCCTGGTGAACCGCATCGAGCTGAAGGGCATCGACTTCAAGGAGGACGG<br>CAACATCCTGGGGCACAAGCTGGAGTACAACACTACAACAGCCACAACGTCTATATCA<br>TGGCCGACAAGCAGAAGAACGGCATCAAGGTGAACTTCAAGATCCGCCACAACATC<br>GAGGACGGCAGCGTGCAGCTCGCCGACCACTACCAGCAGAACACCCCCATCGGGCA<br>CGGCCCGTGTCTGTGCCGACAACCACTACCTGAGCAGCCAGTCCGCCCTGAGCAA<br>AGACCCCAACGAGAAGCGCGATCACATGGTCCCTGCTGGAGTTCGTGACCCGCGCCG<br>GGATCACTCTCGGCATGGACGAACGTACAAGTAAATCCATGAGCAATTAGCATGA<br>ACGTTCTGAAAAGCGCGTTTAGCTCTCCACTACTTACACATATTCTATGCTGCAATAT<br>TGAAAATCTAATAAAACAAAATAATGTACATT                                                                                       |
| Tub5'UTR-<br>Drom-GFP  | TCATATTCGTTTTACGTTTGTCAAGCCTCATAGCCGGCAGTTCGAACGTATACGCTCT<br>CTGAGTCAGACCTCGAAATCGTAGCTCTACACAATTCTGTGAATTTTCCTTGTGCGGT<br>GTGAAACACTTCCAATAAAAACTCAATATGATGCAGATCAAGTACTTGTTCGCCCTC<br>TTCGCTGTCTGATGCTGGTGGTCTGGGAGCCAACGAGGCCGATGCCGACTGCCTG<br>TCCGGAAGATAACAAGGGTCCCTGTGCCGTCTGGGACAACGAGACCTGTCTGTCGTGTG<br>TGCAAGGAGGAGGGACGCTCCAGTGGCCACTGCAGCCCCAGTCTGAAGTGTGGTGTG<br>CGAAGGATGCATGGTGTGCAAGGGCGAGGAGCTGTTACCCGGGGTGGTGGCCATCC<br>TGGTCGAGCTGGACGGCGACGTAAACGGCCACAAGTTCAGCGTGTCCGGCGAGGGC<br>GAGGGCGATGCCACCTACGGCAAGCTGACCCTGAAGTTCATCTGCACCACCGGCAA<br>GCTGCCCGTGGCCCTGGCCACCCCTCGTGACCACCTGACCTACGGCGTGCAGTGCTT<br>CAGCCGCTACCCCGACCACATGAAGCAGCAGCACTTCTTCAAGTCCGCCATGCCCGA<br>AGGCTACGTCCAGGAGCGCACCATCTTCTTCAAGGACGACGGCAACTACAAGACCC<br>GCGCCGAGGTGAAGTTCGAGGGCGACACCCTGGTGAACCGCATCGAGCTGAAGGGC<br>ATCGACTTCAAGGAGGACGGCAACATCCTGGGGCACAAGCTGGAGTACAACACTACAA<br>CAGCCACAACGTCTATATCATGGCCGACAAGCAGAAGAACGGCATCAAGGTGAACT<br>TCAAGATCCGCCACAACATCGAGGACGGCAGCGTGCAGCTCGCCGACCACTACCAG<br>CAGAACACCCCATCGGCGACGGCCCCGTGCTGCTGCCCGACAACCACTACCTGAG<br>CACCCAGTCCGCCCTGAGCAAAGACCCCAACGAGAAGCGCGATCACATGGTCCCTGC<br>TGGAGTTCGTGACCGCCGCGGGATCACTCTCGGCATGGACGAACGTACAAGTAA<br>ATCCATGAGCAATTAGCATGAACGTTCTGAAAAGCGCGTTTAGCTCTCCACTACTTA<br>CACATATTCTATGCTGCAATATTGAAAATCTAATAAAACAAAATAATGTACATT |

**Table S3.** Primer and sequence information for in vivo monocistronic reporters



**Table S4.** Mass spectrometric metrics for the peptides utilized in the analysis of AMP protein levels (Related to Figure 2)
